# Supplementary material for: Effect of Tacrolimus vs Intravenous Cyclophosphamide on Complete or Partial Response in Patients With Lupus Nephritis: A Randomized Clinical Trial
Source: PubMed Central journal article supplement — JAMA Netw Open. 2022 Mar 30;5(3):e224492. doi: 10.1001/jamanetworkopen.2022.4492 (PMC8969066; doi:10.1001/jamanetworkopen.2022.4492), 2022-03-30

## Supplemental Online Content

Zheng Z, Zhang H, Peng X, et al. Effect of tacrolimus vs intravenous cyclophosphamide on complete or partial response in patients with lupus nephritis: a randomized clinical trial. *JAMA Netw Open*. 2022;5(3):e224492.  
doi:10.1001/jamanetworkopen.2022.4492

**eTable 1.** Study Exclusion Criteria

**eTable 2.** Sensitivity and Subgroup Analyses of the Primary Efficacy End Point

**eTable 3.** Study Drug Compliance and Exposure (Safety Population)

**eTable 4.** Results of Sensitivity Analyses of Response Rate at Week 24

**eTable 5.** Subgroup Analyses: Response Rate by Different Pathological Types of LN at Week 24

**eTable 6.** Mean SCr Level and Mean Change from Baseline to Week 24

**eFigure 1.** Mean (SE) Change from Baseline to Week 24 in SLEDAI Score

**eFigure 2.** Mean (SE) Change from Baseline to Week 24 in Serum C3 and Serum C4

This supplemental material has been provided by the authors to give readers additional information about their work.

**eTable 1. Study Exclusion Criteria**

|                                                                                                                                                                                                      |
|------------------------------------------------------------------------------------------------------------------------------------------------------------------------------------------------------|
| Class II or VI LN or with TMA                                                                                                                                                                        |
| Treatment with immunosuppressants (e.g. MMF, ciclosporin, methotrexate, mechlorethamine, chlorambucil, tripterygium preparations, leflunomide) for >1 week within 30 days prior to enrollment        |
| Treatment with tacrolimus (except for topical use) or cyclophosphamide treatment within 30 days prior to enrollment                                                                                  |
| Methylprednisolone pulse therapy or gamma globulin treatment or plasma exchange within 30 days prior to enrollment                                                                                   |
| History of allergy to tacrolimus, cyclophosphamide or methylprednisolone                                                                                                                             |
| Estimated maintenance dialysis >8 weeks or dialysis for >2 weeks prior to study entry                                                                                                                |
| Previous or planned kidney transplantation                                                                                                                                                           |
| SCr $\geq 260$ $\mu\text{mol/L}$ (or $\geq 3$ mg/dL)                                                                                                                                                 |
| Liver dysfunction (AST or ALT $\geq 3$ x ULN) or bilirubin $\geq 3$ x ULN                                                                                                                            |
| Diabetes                                                                                                                                                                                             |
| History of gastrointestinal bleeding or pancreatitis within 3 months                                                                                                                                 |
| Uncontrollable hyperkalemia after dietary therapy or reduction of potassium treatment (>ULN)                                                                                                         |
| Lupus pneumonia or lung injury                                                                                                                                                                       |
| Anemia (hemoglobin <7 g/dL) or bone marrow suppression (WBC <3.0 x 10 <sup>9</sup> /L, and/or neutrophils <1.5 x 10 <sup>9</sup> /L, and/or platelets <50 x 10 <sup>9</sup> /L) not secondary to SLE |
| Congenital heart disease, arrhythmia, heart failure and other serious cardiovascular diseases                                                                                                        |
| Refractory hypertension (defined as blood pressure >180/110 mmHg while taking three different types of antihypertensive drugs [including a diuretic])                                                |
| Recurrent tumours within 5 years                                                                                                                                                                     |
| Severe infection requiring intravenous antibiotics within 2 weeks prior to randomization                                                                                                             |
| Active tuberculosis, hepatitis B or hepatitis C virus infection, or severe immunodeficiency diseases (including active CMV [positive CMV IgM antibody], or HIV infection)                            |
| Lupus encephalopathy or other life-threatening complications of SLE                                                                                                                                  |
| Participation in any other clinical trials within 3 months before enrollment                                                                                                                         |
| Pregnant, lactating, or unwilling to take contraceptive measures                                                                                                                                     |
| Any other patient considered not suitable to participate in this study by the investigator                                                                                                           |

ALT, alanine aminotransferase; AST, aspartate aminotransferase; CMV, cytomegalovirus; HIV, human immunodeficiency virus; LN, lupus nephritis; MMF, mycophenolate mofetil; SCr, serum creatinine; SLE, systemic lupus erythematosus; TMA, thrombotic microangiopathy; ULN, upper limit of normal; WBC, white blood cell.

**eTable 2.** Sensitivity and Subgroup Analyses of the Primary Efficacy End Point

| <b>Sensitivity analyses of response rate carried out by Cochran-Mantel-Haensel test:</b> |
|------------------------------------------------------------------------------------------|
| FAS LOCF                                                                                 |
| PPS, completed week 24 response assessment                                               |
| FAS, completed week 24 response assessment                                               |
| PPS, based on derived response from laboratory test data, LOCF                           |
| FAS, based on derived response from laboratory test data, LOCF                           |
| <b>Subgroup analyses performed to assess primary endpoint by:</b>                        |
| Sex                                                                                      |
| BSA (<median at baseline, ≥median at baseline)                                           |
| Pathological type (III, IV, V, III+V, IV+V)                                              |
| Duration of LN (≤6 months, >6 months)                                                    |
| SLEDAI score (≥10, <10)                                                                  |
| SLEDAI score (≥4, <4)                                                                    |

BSA, body surface area; FAS, full analysis set; LN, lupus nephritis; LOCF, last observation carried forward; PPS, per-protocol set; SLEDAI, Systemic Lupus Erythematosus Disease Activity Index.

**eTable 3.** Study Drug Compliance and Exposure in the Safety Population

| Parameter                           | Treatment group, mean±SD |                                     |
|-------------------------------------|--------------------------|-------------------------------------|
|                                     | Tacrolimus<br>(n=157)    | IVCY<br>(n=142)                     |
| <b>Study drug</b>                   |                          |                                     |
| Dosing compliance, %                | 98.8±4.7                 | 98.6±4.6                            |
| Duration, days                      | 159.6±33.6               | 153.5±40.8                          |
| Total dose                          | 774.8±287.2 mg           | 5.6±1.8 g                           |
| Dose                                | 4.8±1.4 mg/day           | 0.64±0.10 g/m <sup>2</sup> /4 weeks |
| Overall average blood concentration | 5.3±2.0 ng/mL            | –                                   |
| <b>Prednisone</b>                   |                          |                                     |
| Duration, days                      | 160.3±33.7               | 152.5±45.4                          |
| Total dose, mg                      | 3915.2±755.2             | 3755.7±1074.5                       |
| Daily dose, mg                      | 25.4±5.1                 | 26.4±6.1                            |
| <b>Methylprednisolone</b>           |                          |                                     |
| Duration, days                      | 3.4±2.9                  | 5.0±12.2                            |
| Total dose, g                       | 1.6±1.2                  | 1.5±0.1                             |

IVCY, intravenous cyclophosphamide; SD, standard deviation

**eTable 4.** Results of Sensitivity Analyses of Response Rate at Week 24

| Parameter                                                             | Treatment group, n (%) |           | % difference (95% CI)<br>tacrolimus–IVCY |
|-----------------------------------------------------------------------|------------------------|-----------|------------------------------------------|
|                                                                       | Tacrolimus             | IVCY      |                                          |
| <b>FAS, LOCF</b>                                                      |                        |           |                                          |
| n                                                                     | 157                    | 142       |                                          |
| Complete response                                                     | 72 (45.9)              | 47 (33.1) |                                          |
| Partial response                                                      | 50 (31.8)              | 48 (33.8) |                                          |
| Response rate                                                         | 122 (77.7)             | 95 (66.9) | 10.7 (0.5, 20.6)                         |
| <b>PPS, completed week 24 response assessment</b>                     |                        |           |                                          |
| n                                                                     | 141                    | 124       |                                          |
| Complete response                                                     | 70 (49.6)              | 45 (36.3) |                                          |
| Partial response                                                      | 47 (33.3)              | 45 (36.3) |                                          |
| Response rate                                                         | 117 (83.0)             | 90 (72.6) | 9.6 (−0.5, 19.5)                         |
| <b>FAS, completed week 24 response assessment</b>                     |                        |           |                                          |
| n                                                                     | 157                    | 142       |                                          |
| Complete response                                                     | 72 (45.9)              | 47 (33.1) |                                          |
| Partial response                                                      | 48 (30.6)              | 45 (31.7) |                                          |
| Response rate                                                         | 120 (76.4)             | 92 (64.8) | 11.5 (1.2, 21.6)                         |
| <b>PPS, based on derived response from laboratory test data, LOCF</b> |                        |           |                                          |
| n                                                                     | 141                    | 124       |                                          |
| Complete response                                                     | 69 (48.9)              | 46 (37.1) |                                          |
| Partial response                                                      | 47 (33.3)              | 48 (38.7) |                                          |
| Response rate                                                         | 116 (82.3)             | 94 (75.8) | 5.6 (−4.2, 15.4)                         |
| <b>FAS, based on derived response from laboratory test data, LOCF</b> |                        |           |                                          |
| n                                                                     | 157                    | 142       |                                          |
| Complete response                                                     | 71 (45.2)              | 48 (33.8) |                                          |
| Partial response                                                      | 50 (31.8)              | 50 (35.2) |                                          |
| Response rate                                                         | 121 (77.1)             | 98 (69.0) | 7.9 (−2.1, 17.8)                         |

CI, confidence interval; FAS, full analysis set; IVCY, intravenous cyclophosphamide; LN, lupus nephritis; LOCF, last observation carried forward; PPS, per-protocol set

**eTable 5.** Subgroup Analyses: Response Rate by Different Pathological Types of LN at Week 24 (PPS; LOCF).

| Pathological type | Treatment group, n (%) |                 | % difference (95% CI)<br>tacrolimus–IVCY |
|-------------------|------------------------|-----------------|------------------------------------------|
|                   | Tacrolimus<br>(n=141)  | IVCY<br>(n=124) |                                          |
| <b>Type III</b>   |                        |                 |                                          |
| Complete response | 5/8 (62.5)             | 3/7 (42.9)      |                                          |
| Partial response  | 3/8 (37.5)             | 3/7 (42.9)      |                                          |
| Response rate     | 8/8 (100.0)            | 6/7 (85.7)      | –                                        |
| <b>Type IV</b>    |                        |                 |                                          |
| Complete response | 36/59 (61.0)           | 22/48 (45.8)    |                                          |
| Partial response  | 18/59 (30.5)           | 18/48 (37.5)    |                                          |
| Response rate     | 54/59 (91.5)           | 40/48 (83.3)    | 8.2 (–4.5, 22.0)                         |
| <b>Type V</b>     |                        |                 |                                          |
| Complete response | 7/19 (36.8)            | 3/18 (16.7)     |                                          |
| Partial response  | 6/19 (31.6)            | 5/18 (27.8)     |                                          |
| Response rate     | 13/19 (68.4)           | 8/18 (44.4)     | 24.0 (–7.3, 49.6)                        |
| <b>Type III+V</b> |                        |                 |                                          |
| Complete response | 1/14 (7.1)             | 4/15 (26.7)     |                                          |
| Partial response  | 9/14 (64.3)            | 4/15 (26.7)     |                                          |
| Response rate     | 10/14 (71.4)           | 8/15 (53.3)     | 18.1 (–15.9, 46.8)                       |
| <b>Type IV+V</b>  |                        |                 |                                          |
| Complete response | 21/41 (51.2)           | 13/36 (36.1)    |                                          |
| Partial response  | 11/41 (26.8)           | 18/36 (50.0)    |                                          |
| Response rate     | 32/41 (78.0)           | 31/36 (86.1)    | –8.1 (–24.8, 9.7)                        |

IVCY, intravenous cyclophosphamide; LN, lupus nephritis; LOCF, last observation carried forward; PPS, per-protocol set.

**eTable 6.** Mean SCr Level and Mean Change from Baseline to Week 24 (PPS)

| Time point      | Treatment group, mean±SD |                         |                 |                         |
|-----------------|--------------------------|-------------------------|-----------------|-------------------------|
|                 | Tacrolimus<br>(n=141)    |                         | IVCY<br>(n=124) |                         |
|                 | SCr, µmol/L              | Change from<br>baseline | SCr, µmol/L     | Change from<br>baseline |
| <b>Baseline</b> | 74.1±38.59               | –                       | 69.8±34.90      | –                       |
| <b>Week 1</b>   | 78.1± 52.78              | 4.0±34.06               | 68.1±29.23      | -1.4±21.63              |
| <b>Week 2</b>   | 77.2±51.57               | 3.2±34.90               | 66.2±24.27      | -3.6±23.34              |
| <b>Week 4</b>   | 76.8±49.13               | 2.8±35.06               | 64.5±21.49      | -5.2±25.99              |
| <b>Week 8</b>   | 78.1±47.88               | 4.0±35.61               | 63.9±21.99      | -5.9±29.06              |
| <b>Week 12</b>  | 78.0±48.95               | 4.0±38.35               | 65.0±23.85      | -4.7±28.95              |
| <b>Week 16</b>  | 79.3±49.22               | 5.3±38.44               | 64.5±20.47      | -5.2±28.38              |
| <b>Week 20</b>  | 83.5±58.61               | 9.5±47.81               | 65.3±22.05      | -4.4±26.36              |
| <b>Week 24</b>  | 82.9±57.89               | 8.8±48.54               | 64.3±20.67      | -5.4±26.56              |

IVCY, intravenous cyclophosphamide; PPS, per-protocol set; SCr, serum creatinine; SD, standard deviation

**eFigure 1.** Mean (SE) Change from Baseline to Week 24 in SLEDAI Score (PPS)  
IVCY, intravenous cyclophosphamide; PPS, per-protocol set; SLEDAI, Systemic Lupus Erythematosus Disease Activity Index; SE, standard error.

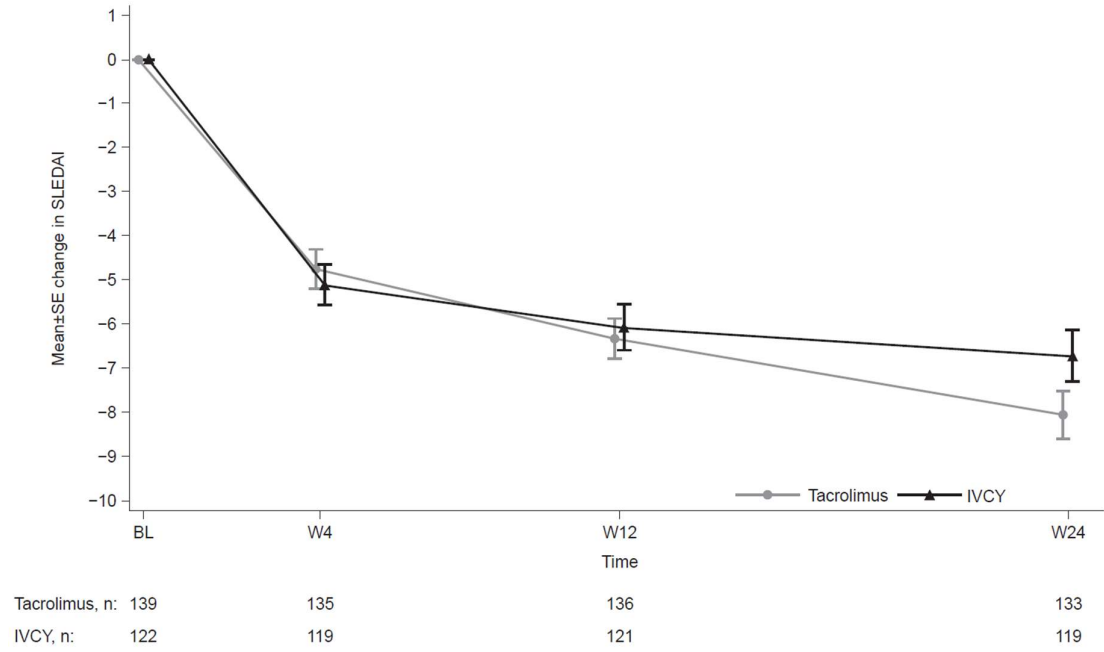



**eFigure 2. Mean (SE) Change from Baseline to Week 24 in Serum C3 and Serum C4**

C3, complement C3; C4, complement C4; IVCY, intravenous cyclophosphamide; PPS, per-protocol set; SE, standard error.

**(A) Serum C3**

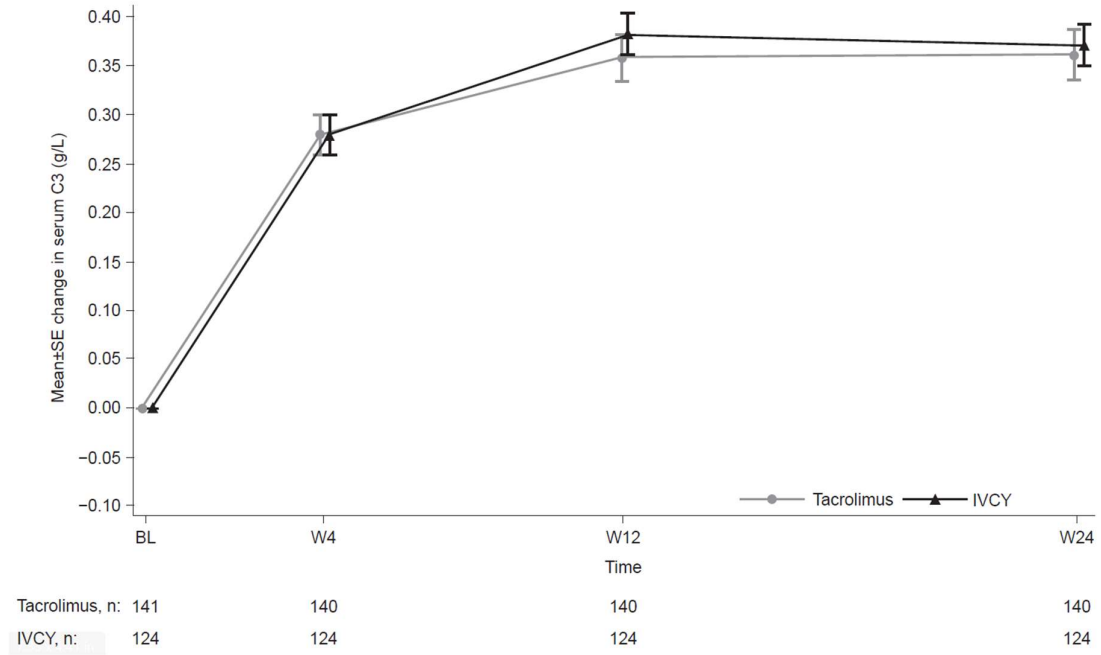

**(B) Serum C4**

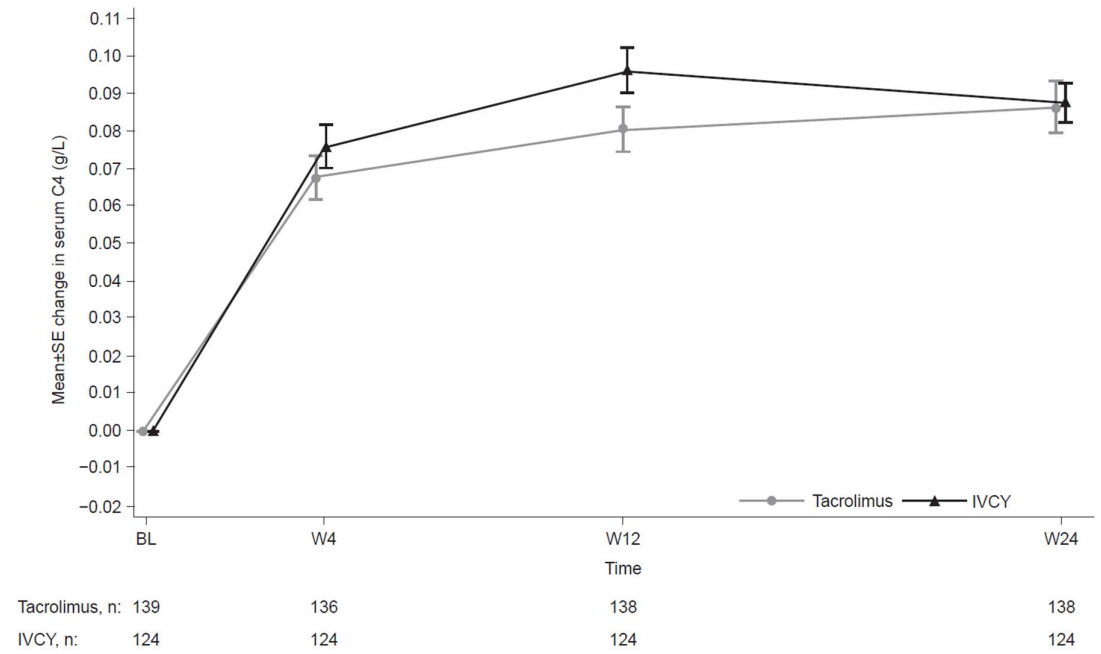

Supplement: jamanetwopen-e224492-s002.pdf [file jamanetwopen-e224492-s002.pdf]
