# Supplementary material for: Effect of Tacrolimus vs Intravenous Cyclophosphamide on Complete or Partial Response in Patients With Lupus Nephritis: A Randomized Clinical Trial
Source: PubMed Central journal article supplement — JAMA Netw Open. 2022 Mar 30;5(3):e224492. doi: 10.1001/jamanetworkopen.2022.4492 (PMC8969066; doi:10.1001/jamanetworkopen.2022.4492), 2022-03-30
Supplement: jamanetwopen-e224492-s003.pdf [file jamanetwopen-e224492-s003.pdf]

## Data Sharing Statement

Zheng. Effect of Tacrolimus vs Intravenous Cyclophosphamide on Complete or Partial Response in Patients With Lupus Nephritis. *JAMA Netw Open*. Published March 30, 2022. doi:10.1001/jamanetworkopen.2022.4492

### Data

**Data available:** No

### Additional Information

**Explanation for why data not available:** Researchers may request access to anonymized participant level data, trial level data and protocols from Astellas sponsored clinical trials at: [www.clinicalstudydatarequest.com](http://www.clinicalstudydatarequest.com). For the Astellas criteria on data sharing see: <https://clinicalstudydatarequest.com/Study-Sponsors/Study-Sponsors-Astellas.aspx>.
